# Supplementary material for: Analysis of ceRNA networks and identification of potential drug targets for drug-resistant leukemia cell K562/ADR
Source: PeerJ. 2021 May 25;9:e11429. doi: 10.7717/peerj.11429 (PMC8162247; doi:10.7717/peerj.11429)
Supplement: Supplemental Information 1 [file peerj-09-11429-s001.xlsx]

## Sheet: Sheet1
GO enrichment analysis were performed on target genes of upregulated lncRNAs.
GO Enrichment	Gene	GeneRatio	Qvalue
nucleosome	11	0.0615041	7.01e-10
oxygen transporter activity	6	0.0335477	2.24e-08
oxygen transport	6	0.0335477	3.28e-08
protein heterodimerization activity	16	0.0894604	4.32e-07
hemoglobin complex	5	0.0279564	9.08e-07
nucleosome assembly	8	0.0447302	1.39e-05
oxygen binding	6	0.0335477	1.44e-05
chromatin silencing at rDNA	5	0.0279564	0.000101
negative regulation of gene expression, epigenetic	5	0.0279564	0.00033
positive regulation of gene expression, epigenetic	5	0.0279564	0.000751
heme binding	6	0.0335477	0.00219236
chromatin silencing	4	0.0223651	0.00325979
nucleosomal DNA binding	4	0.0223651	0.00350717
iron ion binding	6	0.0335477	0.0035313
gene silencing by RNA	5	0.0279564	0.00629963
cellular protein metabolic process	5	0.0279564	0.00779365
histone binding	5	0.0279564	0.00885685
nucleoplasm	30	0.167738	0.00887737
peroxidase activity	3	0.0167738	0.00924155
DNA binding	20	0.111826	0.0138466
GO enrichment analysis were performed on target genes of downregulated lncRNAs.
GO Enrichment	Gene	GeneRatio	Qvalue
cell-cell adhesion	9	0.0422079	0.00117668
cadherin binding involved in cell-cell adhesion	9	0.0422079	0.0019258
cell-cell adherens junction	9	0.0422079	0.0029591
myofibril assembly	3	0.0140693	0.00432151
neutral amino acid transport	3	0.0140693	0.00432151
tropomyosin binding	3	0.0140693	0.00511626
protein oligomerization	4	0.0187591	0.0100491
histamine biosynthetic process	2	0.00937954	0.0153059
actin binding	7	0.0328284	0.0213968
transcription elongation from RNA polymerase II promoter	4	0.0187591	0.0285652
protein deubiquitination	4	0.0187591	0.0307769
membrane fusion	3	0.0140693	0.0349194
negative regulation of protein import into nucleus	2	0.00937954	0.0425612
pointed-end actin filament capping	2	0.00937954	0.0425612
nucleoplasm	29	0.136003	0.04394
protein kinase inhibitor activity	3	0.0140693	0.0446202
nucleus	50	0.234489	0.0446264
intracellular	16	0.0750363	0.0468538
Golgi membrane	9	0.0422079	0.0522986
striated muscle thin filament	3	0.0140693	0.054115
KEGG enrichment analysis were performed on target genes of upregulated lncRNAs.
Pathway	Gene	GeneRatio	Qvalue
Systemic lupus erythematosus	13	0.0977444	4.46e-17
Alcoholism	12	0.0666667	5.41e-14
Transcriptional misregulation in cancer	6	0.0322581	7.45e-06
Metabolic pathways	14	0.00976971	1.06e-05
Necroptosis	5	0.0308642	5.41e-05
Malaria	3	0.0612245	0.000270979
Phagosome	4	0.0263158	0.000559727
Synaptic vesicle cycle	3	0.0384615	0.000994582
Glycosaminoglycan degradation	2	0.105263	0.00115622
Viral carcinogenesis	4	0.0199005	0.00153981
Fc gamma R-mediated phagocytosis	3	0.0319149	0.00167156
Collecting duct acid secretion	2	0.0740741	0.00220754
Glutamatergic synapse	3	0.0263158	0.00284855
African trypanosomiasis	2	0.0540541	0.00396658
Oxidative phosphorylation	3	0.0225564	0.0043448
MAPK signaling pathway	4	0.0135593	0.00592384
Oxytocin signaling pathway	3	0.0196078	0.00635272
Ovarian steroidogenesis	2	0.0408163	0.00669859
Vibrio cholerae infection	2	0.04	0.0069557
VEGF signaling pathway	2	0.0338983	0.00946603
KEGG enrichment analysis were performed on target genes of downregulated lncRNAs.
Pathway	Gene	GeneRatio	Qvalue
Calcium signaling pathway	5	0.0259067	0.000216108
ECM-receptor interaction	3	0.0348837	0.00186536
Glycosaminoglycan biosynthesis - heparan sulfate / heparin	2	0.0833333	0.00226946
Neuroactive ligand-receptor interaction	5	0.0147929	0.00252026
Circadian entrainment	3	0.0309278	0.00259904
RNA polymerase	2	0.0645161	0.0036415
Ferroptosis	2	0.05	0.00584426
Basal transcription factors	2	0.0444444	0.007273
Oxytocin signaling pathway	3	0.0196078	0.00893695
Herpes simplex virus 1 infection	5	0.0101626	0.0116902
Mitophagy - animal	2	0.0307692	0.0143603
PI3K-Akt signaling pathway	4	0.0112994	0.0166538
p53 signaling pathway	2	0.0277778	0.0173283
Focal adhesion	3	0.0150754	0.0178171
Glioma	2	0.0266667	0.0186732
cAMP signaling pathway	3	0.0140187	0.0214764
Insulin secretion	2	0.0232558	0.0239629
mRNA surveillance pathway	2	0.021978	0.0265466
Small cell lung cancer	2	0.0215054	0.0276103
Amoebiasis	2	0.0210526	0.0286909
