# Supplementary material for: Analysis of ceRNA networks and identification of potential drug targets for drug-resistant leukemia cell K562/ADR
Source: PeerJ. 2021 May 25;9:e11429. doi: 10.7717/peerj.11429 (PMC8162247; doi:10.7717/peerj.11429)
Supplement: Supplemental Information 6 — Raw data on the expression of lncRNAs and mRNAs in the drug-resistant K562/ADR cell line; these data were applied in data analysis and preparation of Figs. 3 and S1. [file peerj-09-11429-s006.xlsx]

## Sheet: Sheet1
Sample	Task	CT value			Sample	Task	CT value
K562	GAPDH	14.72			K562	GAPDH	15.4
K562	GAPDH	14.96			K562	GAPDH	15.41
K562	GAPDH	14.83			K562	GAPDH	15.07
K562	LINC01515	23.23			K562	ABCB1	22.99
K562	LINC01515	22.93			K562	ABCB1	22.3
K562	LINC01515	22.72			K562	ABCB1	22.69
K562	CCDC26	29.21			K562	DMTF1	21.61
K562	CCDC26	28.77			K562	DMTF1	21.68
K562	CCDC26	29.15			K562	DMTF1	21.9
K562	LINC01419	27.16			K562	GNG12	22.51
K562	LINC01419	27.06			K562	GNG12	21.77
K562	LINC01419	26.99			K562	GNG12	21.32
K562	LINC00857	27.74			K562	MS4A4A	25.74
K562	LINC00857	27.91			K562	MS4A4A	25.26
K562	LINC00857	27.77			K562	MS4A4A	25.28
K562	DUXAP8	20.93			K562	MARCKS	29.88
K562	DUXAP8	20.96			K562	MARCKS	30.01
K562	DUXAP8	21.03			K562	MARCKS	29.18
K562	LINC02506	18.93			K562	CROT	25.37
K562	LINC02506	18.45			K562	CROT	25.68
K562	LINC02506	18.62			K562	CROT	24.94
K562	LINC01029	22.53			K562	TSPAN5	24.25
K562	LINC01029	22.25			K562	TSPAN5	23.78
K562	LINC01029	22.11			K562	TSPAN5	23.79
K562	Lnc-ALX1	23.21			K562	GLRX5	20.19
K562	Lnc-ALX1	22.82			K562	GLRX5	20.49
K562	Lnc-ALX1	23.08			K562	GLRX5	20.5
K562	ZEB1-AS1	23.39			K562	DICER1	21.56
K562	ZEB1-AS1	23.48			K562	DICER1	22.08
K562	ZEB1-AS1	23.5			K562	DICER1	21.62
Sample	Task	CT value			Sample	Task	CT value
K562/ADR	GAPDH	14.98			K562/ADR	GAPDH	15.12
K562/ADR	GAPDH	15.21			K562/ADR	GAPDH	15.51
K562/ADR	GAPDH	15.13			K562/ADR	GAPDH	15.77
K562/ADR	LINC01515	16.91			K562/ADR	ABCB1	15.08
K562/ADR	LINC01515	16.87			K562/ADR	ABCB1	14.97
K562/ADR	LINC01515	16.84			K562/ADR	ABCB1	14.99
K562/ADR	CCDC26	24.67			K562/ADR	DMTF1	17
K562/ADR	CCDC26	24.7			K562/ADR	DMTF1	17.21
K562/ADR	CCDC26	24.57			K562/ADR	DMTF1	16.95
K562/ADR	LINC01419	22.95			K562/ADR	GNG12	19.46
K562/ADR	LINC01419	22.77			K562/ADR	GNG12	19.31
K562/ADR	LINC01419	22.89			K562/ADR	GNG12	19.43
K562/ADR	LINC00857	24.84			K562/ADR	MS4A4A	22.59
K562/ADR	LINC00857	24.87			K562/ADR	MS4A4A	22.3
K562/ADR	LINC00857	24.75			K562/ADR	MS4A4A	22.37
K562/ADR	DUXAP8	18.86			K562/ADR	MARCKS	27.47
K562/ADR	DUXAP8	18.79			K562/ADR	MARCKS	27.19
K562/ADR	DUXAP8	18.74			K562/ADR	MARCKS	27.63
K562/ADR	LINC02506	16.48			K562/ADR	CROT	20.69
K562/ADR	LINC02506	16.53			K562/ADR	CROT	21.04
K562/ADR	LINC02506	16.81			K562/ADR	CROT	20.98
K562/ADR	LINC01029	20.74			K562/ADR	TSPAN5	22.98
K562/ADR	LINC01029	20.54			K562/ADR	TSPAN5	22.76
K562/ADR	LINC01029	20.63			K562/ADR	TSPAN5	22.78
K562/ADR	Lnc-ALX1	21.28			K562/ADR	GLRX5	19.45
K562/ADR	Lnc-ALX1	21.6			K562/ADR	GLRX5	19.17
K562/ADR	Lnc-ALX1	21.71			K562/ADR	GLRX5	19.3
K562/ADR	ZEB1-AS1	22.14			K562/ADR	DICER1	20.06
K562/ADR	ZEB1-AS1	22.33			K562/ADR	DICER1	20.17
K562/ADR	ZEB1-AS1	22.3			K562/ADR	DICER1	20.37
