# Supplementary material for: Analysis of ceRNA networks and identification of potential drug targets for drug-resistant leukemia cell K562/ADR
Source: PeerJ. 2021 May 25;9:e11429. doi: 10.7717/peerj.11429 (PMC8162247; doi:10.7717/peerj.11429)
Supplement: Supplemental Information 7 — Raw data on the expression of CCDC26, LINC01515, LINC01419, GLRX5 and DICER1 in K562/ADR cells transfected with siRNAs; these data were applied in data analysis and preparation of Figs. 7, 8 and S2. [file peerj-09-11429-s007.xlsx]

## Sheet: Sheet1
Sample	Task	CT value		Sample	Task	CT value
si-NC	GAPDH	15		si-LINC01419-1	GAPDH	15.83
si-NC	GAPDH	15.5		si-LINC01419-1	GAPDH	15.79
si-NC	GAPDH	15.15		si-LINC01419-1	GAPDH	15.63
si-LINC01515-1	GAPDH	14.89		si-LINC01419-2	GAPDH	15.75
si-LINC01515-1	GAPDH	14.97		si-LINC01419-2	GAPDH	15.69
si-LINC01515-1	GAPDH	15.27		si-LINC01419-2	GAPDH	15.73
si-LINC01515-2	GAPDH	14.89
si-LINC01515-2	GAPDH	14.72
si-LINC01515-2	GAPDH	14.92		Sample	Task	CT value
si-CCDC26-1	GAPDH	14.4		si-NC	LINC01419	24.84
si-CCDC26-1	GAPDH	14.06		si-NC	LINC01419	24.72
si-CCDC26-1	GAPDH	14.37		si-NC	LINC01419	24.91
si-CCDC26-2	GAPDH	15.42		si-LINC01419-1	LINC01419	26.83
si-CCDC26-2	GAPDH	15.36		si-LINC01419-1	LINC01419	26.35
si-CCDC26-2	GAPDH	15.34		si-LINC01419-1	LINC01419	26.43
si-DICER1-1	GAPDH	15.16		si-LINC01419-2	LINC01419	26.13
si-DICER1-1	GAPDH	15.25		si-LINC01419-2	LINC01419	26.21
si-DICER1-1	GAPDH	15.62		si-LINC01419-2	LINC01419	26.26
si-DICER1-2	GAPDH	15.91
si-DICER1-2	GAPDH	15.53
si-DICER1-2	GAPDH	15.89
si-GLRX5-1	GAPDH	15.13
si-GLRX5-1	GAPDH	14.92
si-GLRX5-1	GAPDH	15.27
si-GLRX5-2	GAPDH	16.59
si-GLRX5-2	GAPDH	14.9
si-GLRX5-2	GAPDH	15.56
Sample	Task	CT value
si-NC	CCDC26	25.23
si-NC	CCDC26	25.45
si-NC	CCDC26	25.33
si-CCDC26-1	CCDC26	26.83
si-CCDC26-1	CCDC26	26.86
si-CCDC26-1	CCDC26	26.4
si-CCDC26-2	CCDC26	26.63
si-CCDC26-2	CCDC26	26.88
si-CCDC26-2	CCDC26	26.93
Sample	Task	CT value
si-NC	LINC01515	22.01
si-NC	LINC01515	21.98
si-NC	LINC01515	21.81
si-LINC01515-1	LINC01515	23.01
si-LINC01515-1	LINC01515	23.31
si-LINC01515-1	LINC01515	23.14
si-LINC01515-2	LINC01515	22.67
si-LINC01515-2	LINC01515	22.44
si-LINC01515-2	LINC01515	22.42
Sample	Task	CT value
si-NC	GLRX5	18.85
si-NC	GLRX5	18.77
si-NC	GLRX5	18.97
si-CCDC26-1	GLRX5	18.69
si-CCDC26-1	GLRX5	18.94
si-CCDC26-1	GLRX5	18.73
si-CCDC26-2	GLRX5	20.37
si-CCDC26-2	GLRX5	20.33
si-CCDC26-2	GLRX5	20.27
si-GLRX5-1	GLRX5	20.58
si-GLRX5-1	GLRX5	20.18
si-GLRX5-1	GLRX5	20.44
si-GLRX5-2	GLRX5	20.35
si-GLRX5-2	GLRX5	19.89
si-GLRX5-2	GLRX5	20.08
Sample	Task	CT value
si-NC	DICER1	20.73
si-NC	DICER1	20.83
si-NC	DICER1	20.58
si-LINC01515-1	DICER1	21.45
si-LINC01515-1	DICER1	21.39
si-LINC01515-1	DICER1	21.33
si-LINC01515-2	DICER1	21.01
si-LINC01515-2	DICER1	21.21
si-LINC01515-2	DICER1	21.06
si-DICER1-1	DICER1	22.03
si-DICER1-1	DICER1	21.87
si-DICER1-1	DICER1	22.14
si-DICER1-2	DICER1	22.35
si-DICER1-2	DICER1	22.2
si-DICER1-2	DICER1	22.31
