# Supplementary material for: Analysis of ceRNA networks and identification of potential drug targets for drug-resistant leukemia cell K562/ADR
Source: PeerJ. 2021 May 25;9:e11429. doi: 10.7717/peerj.11429 (PMC8162247; doi:10.7717/peerj.11429)
Supplement: Supplemental Information 8 — These data were applied in data analysis and preparation of Figs. 7, 8 and S2. [file peerj-09-11429-s008.xlsx]

## Sheet: Sheet1
CCK8: OD450 value
Doxorubicin(μg/mL)	si-NC			Mean
0	0.736	0.696	0.696	0.709333
0.5	0.684	0.686	0.664	0.678
1	0.596	0.589	0.567	0.584
2	0.517	0.471	0.497	0.495
4	0.386	0.366	0.346	0.366
8	0.288	0.294	0.264	0.282
Doxorubicin(μg/mL)	si-CCDC26-1			Mean
0	0.746	0.716	0.772	0.744667
0.5	0.534	0.517	0.574	0.541667
1	0.372	0.416	0.429	0.405667
2	0.302	0.346	0.318	0.322
4	0.218	0.232	0.266	0.238667
8	0.174	0.203	0.196	0.191
Doxorubicin(μg/mL)	si-CCDC26-2			Mean
0	0.682	0.654	0.719	0.685
0.5	0.579	0.541	0.558	0.559333
1	0.457	0.407	0.435	0.433
2	0.343	0.294	0.337	0.324667
4	0.285	0.245	0.269	0.266333
8	0.227	0.193	0.181	0.200333
Doxorubicin(μg/mL)	si-LINC01515-1			Mean
0	0.729	0.667	0.738	0.711333
0.5	0.566	0.555	0.533	0.551333
1	0.442	0.456	0.427	0.441667
2	0.301	0.337	0.378	0.338667
4	0.267	0.243	0.231	0.247
8	0.188	0.207	0.194	0.196333
Doxorubicin(μg/mL)	si-LINC01515-2			Mean
0	0.788	0.791	0.754	0.777667
0.5	0.641	0.634	0.664	0.646333
1	0.537	0.486	0.476	0.499667
2	0.376	0.412	0.391	0.393
4	0.312	0.273	0.284	0.289667
8	0.258	0.239	0.215	0.237333
Doxorubicin(μg/mL)	si-GLRX5-1			Mean
0	0.761	0.688	0.683	0.710667
0.5	0.505	0.553	0.529	0.529
1	0.408	0.371	0.354	0.377667
2	0.298	0.309	0.33	0.312333
4	0.214	0.228	0.235	0.225667
8	0.174	0.187	0.207	0.189333
Doxorubicin(μg/mL)	si-GLRX5-2			Mean
0	0.656	0.725	0.742	0.707667
0.5	0.575	0.551	0.549	0.558333
1	0.463	0.478	0.452	0.464333
2	0.38	0.332	0.346	0.352667
4	0.297	0.271	0.249	0.272333
8	0.224	0.219	0.192	0.211667
Doxorubicin(μg/mL)	si-DICER1-1			Mean
0	0.698	0.669	0.718	0.695
0.5	0.558	0.546	0.521	0.541667
1	0.416	0.425	0.437	0.426
2	0.333	0.326	0.342	0.333667
4	0.26	0.241	0.259	0.253333
8	0.195	0.235	0.205	0.211667
Doxorubicin(μg/mL)	si-DICER1-2			Mean
0	0.744	0.673	0.732	0.716333
0.5	0.642	0.618	0.604	0.621333
1	0.501	0.435	0.463	0.466333
2	0.417	0.37	0.321	0.369333
4	0.279	0.313	0.331	0.307667
8	0.257	0.241	0.201	0.233
Doxorubicin(μg/mL)	si-LINC01419-1			Mean
0	0.687	0.682	0.682	0.683667
0.5	0.618	0.653	0.641	0.637333
1	0.578	0.561	0.551	0.563333
2	0.492	0.461	0.45	0.467667
4	0.324	0.359	0.34	0.341
8	0.238	0.246	0.277	0.253667
Doxorubicin(μg/mL)	si-LINC01419-2			Mean
0	0.672	0.636	0.627	0.645
0.5	0.614	0.581	0.604	0.599667
1	0.532	0.512	0.529	0.524333
2	0.428	0.451	0.472	0.450333
4	0.311	0.34	0.343	0.331333
8	0.263	0.276	0.228	0.255667
